# Supplementary material for: A life cycle approach to solvent design: challenges and opportunities for ionic liquids – application to CO2 capture
Source: Royal Society of Chemistry journal article supplement (doi:10.1039/d0re00409j), 2020-12-10
Supplement: d0re00409j1.pdf [file d0re00409j1.pdf]

## Electronic Supplementary Information

### A life cycle approach to solvent design: Challenges and opportunities for ionic liquids – application to CO<sub>2</sub> capture

Rosa M. Cuéllar-Franca<sup>\*a</sup>, Pelayo García-Gutiérrez<sup>a</sup>, Jason P. Hallett<sup>b</sup> and Niall Mac Dowell<sup>c,d</sup>

<sup>a</sup> Department of Chemical Engineering and Analytical Science, The University of Manchester, The Mill, Sackville Street, Manchester M13 9PL, UK

<sup>b</sup> Department of Chemical Engineering, Imperial College London, Exhibition Road, London, SW7 2AZ, UK

<sup>c</sup> Centre for Environmental Policy, Imperial College London, Exhibition Road, London, SW7 1NE, UK

<sup>d</sup> Centre for Process Systems Engineering, Imperial College London, Exhibition Road, London, SW7 2AZ, UK

\* Corresponding author: [rosa.cuellarfranca@manchester.ac.uk](mailto:rosa.cuellarfranca@manchester.ac.uk)

#### S1. Consumption and degradation calculations for ionic liquid [Bmim][OAc]

##### Degradation of [Bmim][OAc] at 71 °C, based on the operating conditions

Assumptions:

- 46,900 tonnes of CO<sub>2</sub> capture per year
- 18.9 m<sup>3</sup> of [Bmim][OAc] as initial charge in the absorber
- IL operating temperature = 71 °C
- Plant service life of 25 years

Based on the decomposition rate reported in,<sup>1</sup> [Bmim][OAc] has a service lifetime of 7500 hours, when operating at 71 °C:

$$\frac{75 \text{ hr}}{1 \%} \times 100\% = 7500 \text{ hr service lifetime}$$

$$\frac{8000 \text{ hr/y}}{7500 \text{ hr}} = 1.06 \text{ replacements per year}$$

$$25 \text{ year service life} \times 1.06 \text{ replacements per year} = 26.7 \text{ replacements}$$

According to Shiflett et al.<sup>2</sup>, around 18.9 m<sup>3</sup> or 19,992 kg of [Bmim][OAc] are required for the initial charge of the absorption column, assuming a density of 1057.8 kg m<sup>-3</sup>.<sup>3</sup>

$$18.9 \text{ m}^3 \text{ IL} \times 1,057.8 \frac{\text{kg}}{\text{m}^3} = 19,992 \text{ kg IL}$$

$$\frac{19,992 \text{ kg}}{46,900 \frac{\text{t CO}_2}{\text{y}} \times 25 \text{ y}} = 0.017 \frac{\text{kg IL}}{\text{t CO}_2}$$

$$0.017 \frac{\text{kg IL}}{\text{t CO}_2} \times 26.7 \text{ replacements} = 0.455 \frac{\text{kg IL}}{\text{t CO}_2}$$

$$0.455 \frac{\text{kg IL}}{\text{t CO}_2} \times 0.782 \text{ t CO}_2 \text{ per MWh} = 0.356 \text{ kg IL}$$

## S2. Estimation of raw material requirements for the production of [Bmim][OAc]

This section details the estimations of the quantities of the raw materials used for the synthesis [Bmim][OAc] shown in Table 8 and Table 9 in the paper. The raw materials and their molecular weights are listed in Table S7.

### 1-butyl-3-methylimidazolium acetate

The calculations for the production of 1000 g of [Bmim][OAc] are shown below:

$$1000 \text{ g C}_{10}\text{H}_{18}\text{N}_2\text{O}_2 \div 198.26 \frac{\text{g}}{\text{mol}} = 5 \text{ moles C}_{10}\text{H}_{18}\text{N}_2\text{O}_2$$

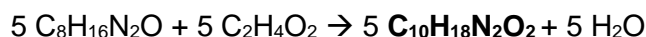

therefore:

$$5 \text{ moles C}_8\text{H}_{16}\text{N}_2\text{O} \times 156.23 \frac{\text{g}}{\text{mol}} = 788 \text{ g C}_8\text{H}_{16}\text{N}_2\text{O}$$

$$5 \text{ moles C}_2\text{H}_4\text{O}_2 \times 60.05 \frac{\text{g}}{\text{mol}} = 303 \text{ g C}_2\text{H}_4\text{O}_2$$

$$5 \text{ moles H}_2\text{O} \times 18.02 \frac{\text{g}}{\text{mol}} = 91 \text{ g H}_2\text{O}$$

### 1-butyl-3-methylimidazolium hydroxide

The calculations for the production of 788 g of [Bmim]OH<sup>-</sup> are as follows:

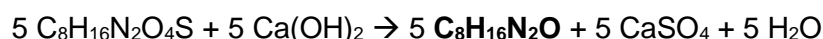

where:

$$5 \text{ moles C}_8\text{H}_{16}\text{N}_2\text{O}_4\text{S} \times 236.3 \frac{\text{g}}{\text{mol}} = 1,192 \text{ g C}_8\text{H}_{16}\text{N}_2\text{O}_4\text{S}$$

$$5 \text{ moles Ca(OH)}_2 \times 74 \frac{\text{g}}{\text{mol}} = 373 \text{ g Ca(OH)}_2$$

$$5 \text{ moles C}_8\text{H}_{16}\text{N}_2\text{O} \times 156.23 \frac{\text{g}}{\text{mol}} = 788 \text{ g C}_8\text{H}_{16}\text{N}_2\text{O}$$

$$5 \text{ moles CaSO}_4 \times 136 \frac{\text{g}}{\text{mol}} = 686 \text{ g CaSO}_4$$

$$5 \text{ moles H}_2\text{O} \times 18.02 \frac{\text{g}}{\text{mol}} = 91 \text{ g H}_2\text{O}$$

### 1-butyl-3-methylimidazolium hydrogen sulfate

The calculations for the production of 1,192 g of [Bmim][HSO<sub>4</sub>] are as follows:

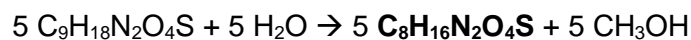

hence:

$$5 \text{ moles C}_9\text{H}_{18}\text{N}_2\text{O}_4\text{S} \times 250.32 \frac{\text{g}}{\text{mol}} = 1,263 \text{ g C}_9\text{H}_{18}\text{N}_2\text{O}_4\text{S}$$

$$5 \text{ moles H}_2\text{O} \times 18.02 \frac{\text{g}}{\text{mol}} = 91 \text{ g H}_2\text{O}$$

$$5 \text{ moles C}_8\text{H}_{16}\text{N}_2\text{O}_4\text{S} \times 236.3 \frac{\text{g}}{\text{mol}} = 1,192 \text{ g C}_8\text{H}_{16}\text{N}_2\text{O}_4\text{S}$$

$$5 \text{ moles CH}_3\text{OH} \times 32 \frac{\text{g}}{\text{mol}} = 162 \text{ g CH}_3\text{OH}$$

### 1-butyl-3-methylimidazolium methyl sulfate

1,263 g (5 moles) of [Bmim][MeSO<sub>4</sub>] is produced according to the following reaction:

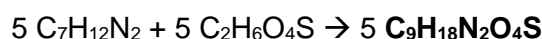

thus:

$$5 \text{ moles C}_7\text{H}_{12}\text{N}_2 \times 124.18 \frac{\text{g}}{\text{mol}} = 626 \text{ g C}_7\text{H}_{12}\text{N}_2$$

$$5 \text{ moles C}_2\text{H}_6\text{O}_4\text{S} \times 126.13 \frac{\text{g}}{\text{mol}} = 636 \text{ g C}_2\text{H}_6\text{O}_4\text{S}$$

$$5 \text{ moles C}_9\text{H}_{18}\text{N}_2\text{O}_4\text{S} \times 250.32 \frac{\text{g}}{\text{mol}} = 1,263 \text{ g C}_9\text{H}_{18}\text{N}_2\text{O}_4\text{S}$$

### 1-butylimidazole

The calculations for the production of 626 g (5 moles) of 1-butylimidazole are shown below:

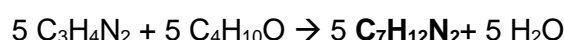

therefore:

$$5 \text{ moles C}_3\text{H}_4\text{N}_2 \times 68.08 \frac{\text{g}}{\text{mol}} = 343 \text{ g C}_3\text{H}_4\text{N}_2$$

$$5 \text{ moles C}_4\text{H}_{10}\text{O} \times 74.12 \frac{\text{g}}{\text{mol}} = 374 \text{ g C}_4\text{H}_{10}\text{O}$$

$$5 \text{ moles C}_7\text{H}_{12}\text{N}_2 \times 124.18 \frac{\text{g}}{\text{mol}} = 626 \text{ g C}_7\text{H}_{12}\text{N}_2$$

$$5 \text{ moles H}_2\text{O} \times 18.02 \frac{\text{g}}{\text{mol}} = 91 \text{ g H}_2\text{O}$$

### 1-imidazole

The production of 343 g (5 moles) of 1-imidazole proceeds according to the following Debus-Radziszewski reaction for imidazole synthesis:<sup>4, 5</sup>

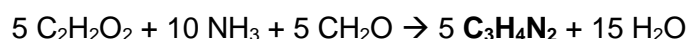

where:

$$5 \text{ moles C}_2\text{H}_2\text{O}_2 \times 58.04 \frac{\text{g}}{\text{mol}} = 293 \text{ g C}_2\text{H}_2\text{O}_2$$

$$10 \text{ moles NH}_3 \times 17.03 \frac{\text{g}}{\text{mol}} = 171 \text{ g NH}_3$$

$$5 \text{ moles CH}_2\text{O} \times 30.03 \frac{\text{g}}{\text{mol}} = 151 \text{ g CH}_2\text{O}$$

$$5 \text{ moles C}_3\text{H}_4\text{N}_2 \times 68.08 \frac{\text{g}}{\text{mol}} = 343 \text{ g C}_3\text{H}_4\text{N}_2$$

$$15 \text{ moles H}_2\text{O} \times 18.02 \frac{\text{g}}{\text{mol}} = 273 \text{ g H}_2\text{O}$$

## **S3. Estimation of energy requirements**

The energy requirements for the production of [Bmim][OAc] and all the precursors were estimated using the heat of formation of the reactants and products, according to the following equations:

$$Q-W = \Delta H + \Delta E_k + \Delta E_p \quad (S1)$$

where:

Q = reactor heat consumption

W = work

$\Delta H$  = enthalpy of reaction

$\Delta E_k$  = kinetic energy

$\Delta E_p$  = potential energy

$$\Delta H = \sum (n \times \hat{H})_{\text{output streams}} - \sum (n \times \hat{H})_{\text{input streams}} \quad (\text{S2})$$

where:

n = molecular weight of reactants

$\hat{H}$  = specific enthalpy of reactants

$$\hat{H} = \Delta \hat{H}^{\circ} + \int_{T_1}^{T_2} C_p dT \quad (\text{S3})$$

where:

$\Delta \hat{H}^{\circ}$  = heat of formation of reactants

$C_p$  = calorific value of reactants

T1 = reference temperature (25 °C)

T2 = temperature of the reactants

The estimated theoretical energy consumption was scaled-up to industrial scale by multiplying it by the correction factors reported in literature.<sup>6</sup> For heat requirements for endothermic reactions, the estimated theoretical value was converted to the actual heat consumption (assumed to be supplied by natural gas) using a correction factor of 4.2. Similarly, the theoretical heat generated by exothermic reactions was converted to the actual cooling electricity requirements using a correction factor of 3.2.

The physico-chemical properties of the chemicals involved in the synthesis of [Bmim][OAc] and its precursors are summarised in Table S1.

### 1-butyl-3-methylimidazolium acetate

The energy inventory for the production of 1000 g of [Bmim]oac has been estimated based on the heat requirements of the reactor using eqns. (S1)–(S3). Table S1 shows the input and output streams involved in the synthesis of [Bmim]oac based on:

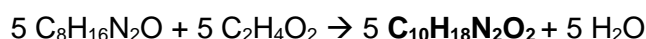

The specific enthalpies  $\hat{H}$  for each chemical compound in the reaction were estimated according to eqn. (3) as follows:

$$\hat{H}_1 = \Delta \hat{H}^{\circ} \text{ C}_8\text{H}_{16}\text{N}_2\text{O} (25^{\circ}\text{C}) + \int_{25^{\circ}\text{C}}^{25^{\circ}\text{C}} C_p dT = -180 \frac{\text{kJ}}{\text{mol}} + 0 = -180 \frac{\text{kJ}}{\text{mol}}$$

$$\hat{H}_2 = \Delta \hat{H}^{\circ} \text{ C}_2\text{H}_4\text{O}_2 (25^{\circ}\text{C}) + \int_{25^{\circ}\text{C}}^{25^{\circ}\text{C}} C_p dT = -484.04 \frac{\text{kJ}}{\text{mol}} + 0 = -484.04 \frac{\text{kJ}}{\text{mol}}$$

$$\hat{H}_3 = \Delta \hat{H}^{\circ} \text{ C}_{10}\text{H}_{18}\text{N}_2\text{O}_2 (25^{\circ}\text{C}) + \int_{25^{\circ}\text{C}}^{25^{\circ}\text{C}} C_p dT = -180 \frac{\text{kJ}}{\text{mol}} + 0 = -180 \frac{\text{kJ}}{\text{mol}}$$

$$\hat{H}_4 = \Delta \hat{H}^{\circ} \text{ H}_2\text{O} (25^{\circ}\text{C}) + \int_{25^{\circ}\text{C}}^{25^{\circ}\text{C}} C_p dT = -285.83 \frac{\text{kJ}}{\text{mol}} + 0 = -285.83 \frac{\text{kJ}}{\text{mol}}$$

The enthalpy of the reaction was calculated using eqn. (S2) based on the specific enthalpy values  $\hat{H}$  estimated for each chemical compound involved in the reaction of the synthesis of [Bmim]oac as shown in **Error! Reference source not found.** Hence:

$$\Delta H = \left[ \left( 5 \text{ mol} \times -180 \frac{\text{kJ}}{\text{mol}} \right) + \left( 5 \text{ mol} \times -285.83 \frac{\text{kJ}}{\text{mol}} \right) \right] - \left[ \left( 5 \text{ mol} \times -180 \frac{\text{kJ}}{\text{mol}} \right) + \left( 5 \text{ mol} \times -484.04 \frac{\text{kJ}}{\text{mol}} \right) \right]$$

$$= 1733 \text{ kJ}$$

According to eqn. (S1), the heat required by the reactor is equal to the enthalpy of reaction assuming that no work is carried and that the kinetic and potential energy are zero. A negative  $\Delta H$  value indicates that an exothermic reaction is taking place and therefore heat needs to be removed through cooling. Therefore, the theoretical heat needed to be removed from the reactor is equal to:

$$Q \approx \Delta H = 1733 \text{ kJ} = 1.7 \text{ MJ} \approx 2 \text{ MJ}$$

Using the correction factor 4.2, this heat is equivalent to 7.3 MJ of actual heat needed to heat the reactor using natural gas.

**Table S1 Input and output streams for the production of [Bmim][OAc]**

| Chemical compound                                             | n input (mol) | $\hat{H}$ input (kJ/mol) | n output (mol) | $\hat{H}$ output (kJ/mol) |
|---------------------------------------------------------------|---------------|--------------------------|----------------|---------------------------|
| C <sub>8</sub> H <sub>16</sub> N <sub>2</sub> O               | 5             | $\hat{H}1$               | --             | --                        |
| C <sub>2</sub> H <sub>4</sub> O <sub>2</sub>                  | 5             | $\hat{H}2$               | --             | --                        |
| C <sub>10</sub> H <sub>18</sub> N <sub>2</sub> O <sub>2</sub> | --            | --                       | 5              | $\hat{H}3$                |
| H <sub>2</sub> O                                              | --            | --                       | 5              | $\hat{H}4$                |

### 1-butyl-3-methylimidazolium hydroxide

Table S2 shows the input and output streams involved in the synthesis of 788 g of [Bmim]OH<sup>-</sup> based on the reaction below:

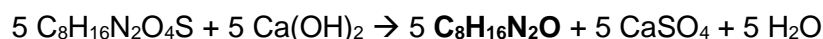

The specific enthalpies  $\hat{H}$  for the compounds involved in the synthesis of [Bmim]OH<sup>-</sup> were estimated according to eqn. (S3):

$$\hat{H}1 = \Delta \hat{H}^{\circ} \text{ C}_8\text{H}_{16}\text{N}_2\text{O}_4\text{S} (25^{\circ}\text{C}) + \int_{25^{\circ}\text{C}}^{25^{\circ}\text{C}} C_p dT = -584.3 \frac{\text{kJ}}{\text{mol}} + 0 = -584.3 \frac{\text{kJ}}{\text{mol}}$$

$$\hat{H}2 = \Delta \hat{H}^{\circ} \text{ Ca(OH)}_2 (25^{\circ}\text{C}) + \int_{25^{\circ}\text{C}}^{25^{\circ}\text{C}} C_p dT = -610.76 \frac{\text{kJ}}{\text{mol}} + 0 = -610.76 \frac{\text{kJ}}{\text{mol}}$$

$$\hat{H}3 = \Delta \hat{H}^{\circ} \text{ C}_8\text{H}_{16}\text{N}_2\text{O} (25^{\circ}\text{C}) + \int_{25^{\circ}\text{C}}^{25^{\circ}\text{C}} C_p dT = -180 \frac{\text{kJ}}{\text{mol}} + 0 = -180 \frac{\text{kJ}}{\text{mol}}$$

$$\hat{H}4 = \Delta \hat{H}^{\circ} \text{ CaSO}_4 (25^{\circ}\text{C}) + \int_{25^{\circ}\text{C}}^{25^{\circ}\text{C}} C_p dT = -1435.1 + 0 = -1435.1 \frac{\text{kJ}}{\text{mol}}$$

$$\hat{H}5 = \Delta \hat{H}^{\circ} \text{ H}_2\text{O} (25^{\circ}\text{C}) + \int_{25^{\circ}\text{C}}^{25^{\circ}\text{C}} C_p dT = -285.83 + 0 = -285.83 \frac{\text{kJ}}{\text{mol}}$$

The enthalpy of the reaction, calculated using eqn. (S2) is thus equal to:

$$\Delta H = \left[ \left( 5 \text{ mol} \times -180 \frac{\text{kJ}}{\text{mol}} \right) + \left( 5 \text{ mol} \times -1435.1 \frac{\text{kJ}}{\text{mol}} \right) + \left( 5 \text{ mol} \times -285.83 \frac{\text{kJ}}{\text{mol}} \right) \right] - \left[ \left( 5 \text{ mol} \times -584 \frac{\text{kJ}}{\text{mol}} \right) + \left( 5 \text{ mol} \times -610.76 \frac{\text{kJ}}{\text{mol}} \right) \right]$$

$$= 2248 \text{ kJ}$$

Therefore, making the same assumptions in eqn. (S1) as for the previous precursors, the theoretical heat needed to be added to the reactor is equal to 2.2 MJ. Applying the correction factor of 4.2, this heat is equivalent to 9.4 MJ of heat produced from natural gas to heat the reactor.

**Table S2 Input and output streams for the production of [Bmim]OH<sup>+</sup>**

| Chemical compound                                              | n input (mol) | $\hat{H}$ input (kJ/mol) | n output (mol) | $\hat{H}$ output (kJ/mol) |
|----------------------------------------------------------------|---------------|--------------------------|----------------|---------------------------|
| C <sub>8</sub> H <sub>16</sub> N <sub>2</sub> O <sub>4</sub> S | 5             | $\hat{H}1$               | --             | --                        |
| Ca(OH) <sub>2</sub>                                            | 5             | $\hat{H}2$               | --             | --                        |
| C <sub>8</sub> H <sub>16</sub> N <sub>2</sub> O                | --            | --                       | 5              | $\hat{H}3$                |
| CaSO <sub>4</sub>                                              | --            | --                       | 5              | $\hat{H}4$                |
| H <sub>2</sub> O                                               | --            | --                       | 5              | $\hat{H}5$                |

**1-butyl-3-methylimidazolium hydrogen sulfate**

Table S3 shows the input and output streams involved in the synthesis of 1,192 g of [Bmim][HSO<sub>4</sub>] based on the following reaction:

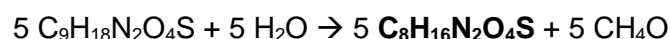

The specific enthalpies  $\hat{H}$  for the compounds involved in the synthesis of [Bmim][HSO<sub>4</sub>] were estimated according to eqn. (S3):

$$\begin{aligned}\hat{H}1 &= \Delta\hat{H}_f^\circ \text{ C}_9\text{H}_{18}\text{N}_2\text{O}_4\text{S} (25^\circ\text{C}) + \int_{25^\circ\text{C}}^{25^\circ\text{C}} C_p dT = -584.3 \frac{\text{kJ}}{\text{mol}} + 0 = -584.3 \frac{\text{kJ}}{\text{mol}} \\ \hat{H}2 &= \Delta\hat{H}_f^\circ \text{ H}_2\text{O} (25^\circ\text{C}) + \int_{25^\circ\text{C}}^{25^\circ\text{C}} C_p dT = -285.83 \frac{\text{kJ}}{\text{mol}} + 0 = -285.83 \frac{\text{kJ}}{\text{mol}} \\ \hat{H}3 &= \Delta\hat{H}_f^\circ \text{ C}_8\text{H}_{16}\text{N}_2\text{O}_4\text{S} (25^\circ\text{C}) + \int_{25^\circ\text{C}}^{25^\circ\text{C}} C_p dT = -584.3 \frac{\text{kJ}}{\text{mol}} + 0 = -584.3 \frac{\text{kJ}}{\text{mol}} \\ \hat{H}4 &= \Delta\hat{H}_f^\circ \text{ CH}_4\text{O} (25^\circ\text{C}) + \int_{25^\circ\text{C}}^{25^\circ\text{C}} C_p dT = -238.93 \frac{\text{kJ}}{\text{mol}} + 0 = -238.93 \frac{\text{kJ}}{\text{mol}}\end{aligned}$$

The enthalpy of the reaction, calculated using eqn. (S2) is thus equal to:

$$\begin{aligned}\Delta H &= \left[ \left( 5 \text{ mol} \times -584.3 \frac{\text{kJ}}{\text{mol}} \right) + \left( 5 \text{ mol} \times -238.93 \frac{\text{kJ}}{\text{mol}} \right) \right] - \left[ \left( 5 \text{ mol} \times -584.3 \frac{\text{kJ}}{\text{mol}} \right) + \left( 5 \text{ mol} \times -285.83 \frac{\text{kJ}}{\text{mol}} \right) \right] \\ &= 2604 \text{ kJ}\end{aligned}$$

Therefore, making the same assumptions in eqn. (S1) as for the previous precursors, the theoretical heat needed in the reactor is equal to 2.6 MJ. Applying the correction factor of 4.2, this heat is equivalent to 10.9 MJ of heat from natural gas.

**Table S3 Input and output streams for the production of [Bmim][HSO<sub>4</sub>]**

| Chemical compound                                              | n input (mol) | $\hat{H}$ input (kJ/mol) | n output (mol) | $\hat{H}$ output (kJ/mol) |
|----------------------------------------------------------------|---------------|--------------------------|----------------|---------------------------|
| C <sub>9</sub> H <sub>18</sub> N <sub>2</sub> O <sub>4</sub> S | 5             | $\hat{H}1$               | --             | --                        |
| H <sub>2</sub> O                                               | 5             | $\hat{H}2$               | --             | --                        |
| C <sub>8</sub> H <sub>16</sub> N <sub>2</sub> O <sub>4</sub> S | --            | --                       | 5              | $\hat{H}3$                |
| CH <sub>4</sub> O                                              | --            | --                       | 5              | $\hat{H}4$                |

**1-butyl-3-methylimidazolium methyl sulfate**

The input and output streams involved in the synthesis of 1,263 g of [Bmim][MeSO<sub>4</sub>] are summarised in Table S4. The synthesis is carried out according to:

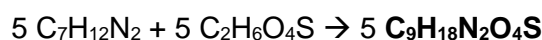

The specific enthalpies were estimated as follows:

$$\hat{H}1 = \Delta\hat{H}_f^\circ \text{ C}_7\text{H}_{12}\text{N}_2 (25^\circ\text{C}) + \int_{25^\circ\text{C}}^{25^\circ\text{C}} C_p dT = 58.9 \frac{\text{kJ}}{\text{mol}} + 0 = 58.9 \frac{\text{kJ}}{\text{mol}}$$

$$\hat{H}_2 = \Delta \hat{H}_f^\circ \text{C}_2\text{H}_6\text{O}_4\text{S} (25^\circ\text{C}) + \int_{25^\circ\text{C}}^{25^\circ\text{C}} C_p dT = -735.25 \frac{\text{kJ}}{\text{mol}} + 0 = -735.25 \frac{\text{kJ}}{\text{mol}}$$

$$\hat{H}_3 = \Delta \hat{H}_f^\circ \text{C}_9\text{H}_{18}\text{N}_2\text{O}_4\text{S} (25^\circ\text{C}) + \int_{25^\circ\text{C}}^{25^\circ\text{C}} C_p dT = -584.3 \frac{\text{kJ}}{\text{mol}} + 0 = -584.3 \frac{\text{kJ}}{\text{mol}}$$

The total enthalpy is equal to:

$$\Delta H = \left[ \left( 5 \text{ mol} \times -584.3 \frac{\text{kJ}}{\text{mol}} \right) \right] - \left[ \left( 5 \text{ mol} \times 58.9 \frac{\text{kJ}}{\text{mol}} \right) + \left( 10 \text{ mol} \times -735.25 \frac{\text{kJ}}{\text{mol}} \right) \right]$$

$$= 464 \text{ kJ}$$

Making the same assumptions as for the other precursors, the total theoretical heating energy is equal to 0.5 MJ, so that the actual heat demand supplied by natural gas is estimated at 2 MJ.

**Table S4 Input and output streams for the production of [Bmim][MeSO<sub>4</sub>]**

| Chemical compound                                              | n input (mol) | $\hat{H}$ input (kJ/mol) | n output (mol) | $\hat{H}$ output (kJ/mol) |
|----------------------------------------------------------------|---------------|--------------------------|----------------|---------------------------|
| C <sub>7</sub> H <sub>12</sub> N <sub>2</sub>                  | 5             | $\hat{H}_1$              | --             | --                        |
| C <sub>2</sub> H <sub>6</sub> O <sub>4</sub> S                 | 10            | $\hat{H}_2$              | --             | --                        |
| C <sub>9</sub> H <sub>18</sub> N <sub>2</sub> O <sub>4</sub> S | --            | --                       | 5              | $\hat{H}_3$               |

### 1-buthylimidazole

Table S5 shows the input and output streams involved in the synthesis of 626 g of 1-buthylimidazole based on the following reaction:

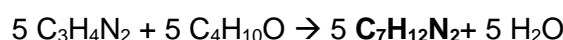

The specific enthalpies were estimated as follows:

$$\hat{H}_1 = \Delta \hat{H}_f^\circ \text{C}_3\text{H}_4\text{N}_2 (25^\circ\text{C}) + \int_{25^\circ\text{C}}^{25^\circ\text{C}} C_p dT = 54.3 \frac{\text{kJ}}{\text{mol}} + 0 = 54.3 \frac{\text{kJ}}{\text{mol}}$$

$$\hat{H}_2 = \Delta \hat{H}_f^\circ \text{C}_4\text{H}_{10}\text{O} (25^\circ\text{C}) + \int_{25^\circ\text{C}}^{25^\circ\text{C}} C_p dT = 328.3 \frac{\text{kJ}}{\text{mol}} + 0 = 328.3 \frac{\text{kJ}}{\text{mol}}$$

$$\hat{H}_3 = \Delta \hat{H}_f^\circ \text{C}_7\text{H}_{12}\text{N}_2 (25^\circ\text{C}) + \int_{25^\circ\text{C}}^{25^\circ\text{C}} C_p dT = 58.9 \frac{\text{kJ}}{\text{mol}} + 0 = 58.9 \frac{\text{kJ}}{\text{mol}}$$

$$\hat{H}_4 = \Delta \hat{H}_f^\circ \text{H}_2\text{O} (25^\circ\text{C}) + \int_{25^\circ\text{C}}^{25^\circ\text{C}} C_p dT = -285.83 \frac{\text{kJ}}{\text{mol}} + 0 = -285.83 \frac{\text{kJ}}{\text{mol}}$$

The total enthalpy is equal to:

$$\Delta H = \left[ \left( 5 \text{ mol} \times 58.9 \frac{\text{kJ}}{\text{mol}} \right) + \left( 5 \text{ mol} \times -285.83 \frac{\text{kJ}}{\text{mol}} \right) \right] - \left[ \left( 5 \text{ mol} \times 54.3 \frac{\text{kJ}}{\text{mol}} \right) + \left( 5 \text{ mol} \times -328.3 \frac{\text{kJ}}{\text{mol}} \right) \right]$$

$$= -3075 \text{ kJ}$$

Therefore, making the same assumptions in eqn. (S1) as for the previous precursors, the total theoretical electricity needed to cool the reactor is equal to 3.1 MJ. Applying the correction factor of 3.2, the actual electricity needed to remove heat from the reactor is estimated at 9.8 MJ.

**Table S5 Input and output streams for the production of 1-buthylimidazole**

| Chemical compound                            | n input (mol) | $\hat{H}$ input (kJ/mol) | n output (mol) | $\hat{H}$ output (kJ/mol) |
|----------------------------------------------|---------------|--------------------------|----------------|---------------------------|
| C <sub>3</sub> H <sub>4</sub> N <sub>2</sub> | 5             | $\hat{H}_1$              | --             | --                        |
| C <sub>4</sub> H <sub>10</sub> O             | 5             | $\hat{H}_2$              | --             | --                        |

|                                               |    |    |   |             |
|-----------------------------------------------|----|----|---|-------------|
| C <sub>7</sub> H <sub>12</sub> N <sub>2</sub> | -- | -- | 5 | $\hat{H}_3$ |
| H <sub>2</sub> O                              | -- | -- | 5 | $\hat{H}_4$ |

### 1-imidazole

The energy inventory for the production of 343 g of 1-imidazole has been estimated based on the heat requirements of the reactor using eqns. (S1)–(S3). Table S6 lists the input and output streams involved in the reaction shown below:

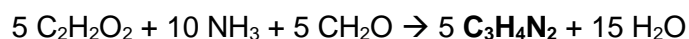

The specific enthalpies were estimated as follows:

$$\begin{aligned}\hat{H}_1 &= \Delta \hat{H}_f^\circ \text{ C}_2\text{H}_2\text{O}_2 (25^\circ\text{C}) + \int_{25^\circ\text{C}}^{25^\circ\text{C}} C_p dT = -212 \frac{\text{kJ}}{\text{mol}} + 0 = -212 \frac{\text{kJ}}{\text{mol}} \\ \hat{H}_2 &= \Delta \hat{H}_f^\circ \text{ NH}_3 (25^\circ\text{C}) + \int_{25^\circ\text{C}}^{25^\circ\text{C}} C_p dT = -45.92 \frac{\text{kJ}}{\text{mol}} + 0 = -45.92 \frac{\text{kJ}}{\text{mol}} \\ \hat{H}_3 &= \Delta \hat{H}_f^\circ \text{ CH}_2\text{O} (25^\circ\text{C}) + \int_{25^\circ\text{C}}^{25^\circ\text{C}} C_p dT = -112.25 \frac{\text{kJ}}{\text{mol}} + 0 = -112.25 \frac{\text{kJ}}{\text{mol}} \\ \hat{H}_4 &= \Delta \hat{H}_f^\circ \text{ C}_3\text{H}_4\text{N}_2 (25^\circ\text{C}) + \int_{25^\circ\text{C}}^{25^\circ\text{C}} C_p dT = 54.3 \frac{\text{kJ}}{\text{mol}} + 0 = 54.3 \frac{\text{kJ}}{\text{mol}} \\ \hat{H}_5 &= \Delta \hat{H}_f^\circ \text{ H}_2\text{O} (25^\circ\text{C}) + \int_{25^\circ\text{C}}^{25^\circ\text{C}} C_p dT = -285.83 \frac{\text{kJ}}{\text{mol}} + 0 = -285.83 \frac{\text{kJ}}{\text{mol}}\end{aligned}$$

Therefore, the overall enthalpy for the reactions is equal to:

$$\begin{aligned}\Delta H &= \left[ \left( 5 \text{ mol} \times 54.3 \frac{\text{kJ}}{\text{mol}} \right) + \left( 15 \text{ mol} \times -285.83 \frac{\text{kJ}}{\text{mol}} \right) \right] - \left[ \left( 5 \text{ mol} \times -212 \frac{\text{kJ}}{\text{mol}} \right) + \right. \\ &\quad \left. \left( 10 \text{ mol} \times -45.92 \frac{\text{kJ}}{\text{mol}} \right) + \left( 5 \text{ mol} \times -112.25 \frac{\text{kJ}}{\text{mol}} \right) \right] \\ &= -1,952 \text{ kJ}\end{aligned}$$

Making the same assumptions as for the other precursors, the total theoretical cooling energy is equal to 2 MJ so that the actual electricity demand for cooling is estimated at 6.2 MJ.

**Table S6 Input and output streams for the production of 1-imidazole**

| Chemical compound                            | n input (mol) | $\hat{H}$ input (kJ/mol) | n output (mol) | $\hat{H}$ output (kJ/mol) |
|----------------------------------------------|---------------|--------------------------|----------------|---------------------------|
| C <sub>2</sub> H <sub>2</sub> O <sub>2</sub> | 5             | $\hat{H}_1$              | --             | --                        |
| NH <sub>3</sub>                              | 10            | $\hat{H}_2$              | --             | --                        |
| CH <sub>2</sub> O                            | 5             | $\hat{H}_3$              | --             | --                        |
| C <sub>3</sub> H <sub>4</sub> N <sub>2</sub> | --            | --                       | 5              | $\hat{H}_4$               |
| H <sub>2</sub> O                             | --            | --                       | 15             | $\hat{H}_5$               |



**Table S7 Physico-chemical properties of chemical compounds used in the synthesis of [Bmim][OAc] and its precursors**

| Chemical compound                            | Chemical formula                                               | Molecular weight (g/mol) | Heat of formation, $\Delta H_f^\circ$ 25°C (kJ/mol) | Assumptions                                                             | Source |
|----------------------------------------------|----------------------------------------------------------------|--------------------------|-----------------------------------------------------|-------------------------------------------------------------------------|--------|
| 1-butyl-3-methylimidazolium acetate          | C <sub>10</sub> H <sub>18</sub> N <sub>2</sub> O <sub>2</sub>  | 198.3                    | -180                                                | $\Delta H_f^\circ$ of [Bmim][Br] used as proxy.                         | 7      |
| 1-butyl-3-methylimidazolium hydroxide        | C <sub>8</sub> H <sub>16</sub> N <sub>2</sub> O                | 156.23                   | -180                                                | $\Delta H_f^\circ$ of [Bmim][Br] used as proxy.                         | 7      |
| 1-butyl-3-methylimidazolium hydrogen sulfate | C <sub>8</sub> H <sub>16</sub> N <sub>2</sub> O <sub>4</sub> S | 236.30                   | -584.3                                              | $\Delta H_f^\circ$ of ionic liquid [Emim][ethyl sulfate] used as proxy. | 8      |
| 1-butyl-3-methylimidazolium methyl sulfate   | C <sub>9</sub> H <sub>18</sub> N <sub>2</sub> O <sub>4</sub> S | 250.32                   | -584.3                                              | $\Delta H_f^\circ$ of ionic liquid [Emim][ethyl sulfate] used as proxy. | 4      |
| 1-butylimidazole                             | C <sub>7</sub> H <sub>12</sub> N <sub>2</sub>                  | 124.18                   | 58.9                                                |                                                                         | 9      |
| Acetic acid                                  | C <sub>2</sub> H <sub>4</sub> O <sub>2</sub>                   | 60.05                    | -484.04                                             |                                                                         | -  -   |
| Ammonia                                      | NH <sub>3</sub>                                                | 17.03                    | -45.92                                              |                                                                         | -  -   |
| Calcium hydroxide                            | Ca(OH) <sub>2</sub>                                            | 74.00                    | -610.76                                             |                                                                         | -  -   |
| Calcium sulfate                              | CaSO <sub>4</sub>                                              | 136.00                   | -1435.1                                             |                                                                         | -  -   |
| Dimethyl sulfate                             | C <sub>2</sub> H <sub>6</sub> O <sub>4</sub> S                 | 126.13                   | -735.25                                             |                                                                         | -  -   |
| Formaldehyde                                 | CH <sub>2</sub> O                                              | 30.03                    | -112.25                                             |                                                                         | -  -   |
| Glyoxal                                      | C <sub>2</sub> H <sub>2</sub> O <sub>2</sub>                   | 58.04                    | -212                                                |                                                                         | -  -   |
| Imidazole                                    | C <sub>3</sub> H <sub>4</sub> N <sub>2</sub>                   | 68.08                    | 54.3                                                |                                                                         | -  -   |
| Methanol                                     | CH <sub>4</sub> O                                              | 32.04                    | -238.93                                             |                                                                         | -  -   |
| Water                                        | H <sub>2</sub> O                                               | 18.02                    | -285.83                                             |                                                                         | -  -   |

## S4. Environmental impacts of the UK and average EU-27 electricity mix, used in the study.

Table S7 UK and EU-27 average electricity mix.<sup>10-12</sup>

| UK Electricity mix<br>fuel source <sup>10</sup> | 2017 average<br>(%) | EU-27 Electricity mix<br>fuel source <sup>11, 12</sup> | 2018 average<br>(%) |
|-------------------------------------------------|---------------------|--------------------------------------------------------|---------------------|
| Coal                                            | 6.5                 | Coal                                                   | 22.2                |
| Natural gas                                     | 39.5                | Natural gas                                            | 21.2                |
| Oil                                             | 0.5                 | Oil                                                    | 2.1                 |
| Nuclear                                         | 19.3                | Nuclear                                                | 25.8                |
| Hydro                                           | 1.8                 | Hydro                                                  | 13                  |
| Wind and solar                                  | 18.4                | Wind                                                   | 11.3                |
| Bioenergy                                       | 8.3                 | Solar                                                  | 4.1                 |
| Pumped storage                                  | -0.4                | Geothermal                                             | 0.2                 |
| Waste & industrial gas                          | 1.6                 | Other                                                  | 0.1                 |
| Net imports                                     | 4.5                 | --                                                     | --                  |

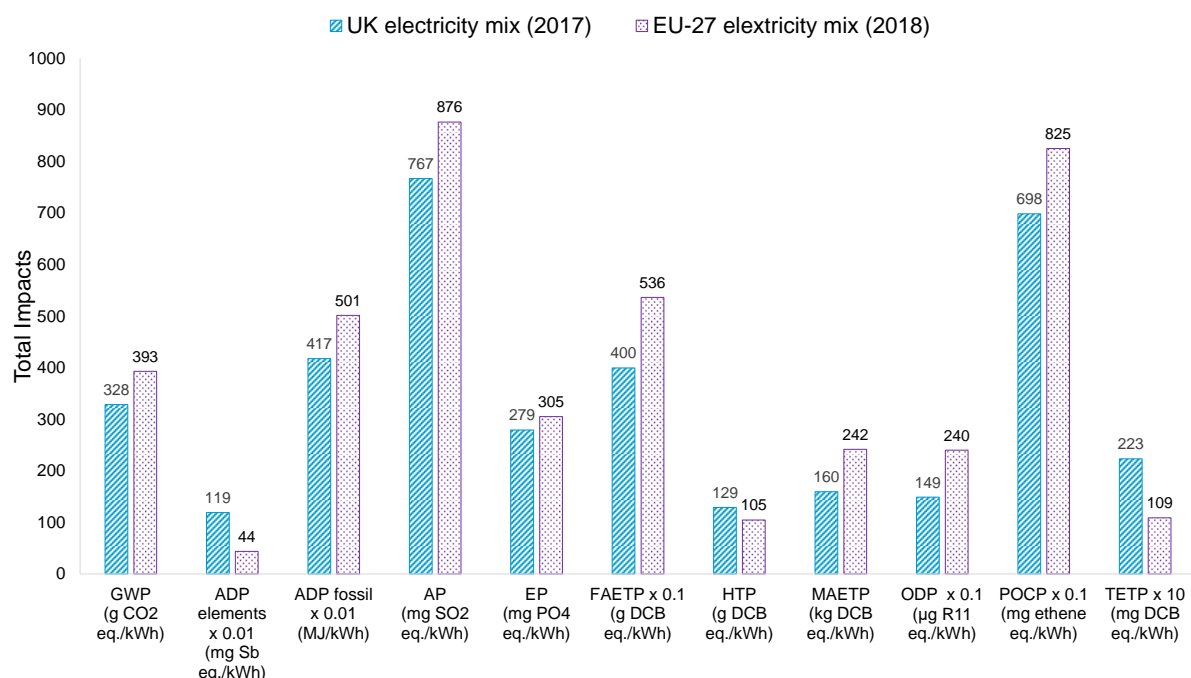

**Figure S1 Life cycle environmental impacts of the UK and average EU-27 electricity mix based on average fuel sources reported in the literature.**<sup>10-12</sup>

[The values for some impacts have been scaled to fit. The original values can be obtained by multiplying the value shown on top of the bars by the scaling factor given on the x-axis. GWP: global warming potential; ADP elements: abiotic depletion potential of elements; ADP fossil: abiotic depletion potential of fossil resources; AP: acidification potential; EP: eutrophication potential; FAETP: fresh water aquatic ecotoxicity potential; HTP: human toxicity potential; MAETP: marine aquatic ecotoxicity potential; ODP: ozone depletion potential; POCP; photochemical oxidants creation potential; TETP: terrestrial ecotoxicity potential. DCB: dichlorobenzene.]

## S5. Life cycle stages contribution to other environmental impacts

### (a) Human toxicity potential (HTP)

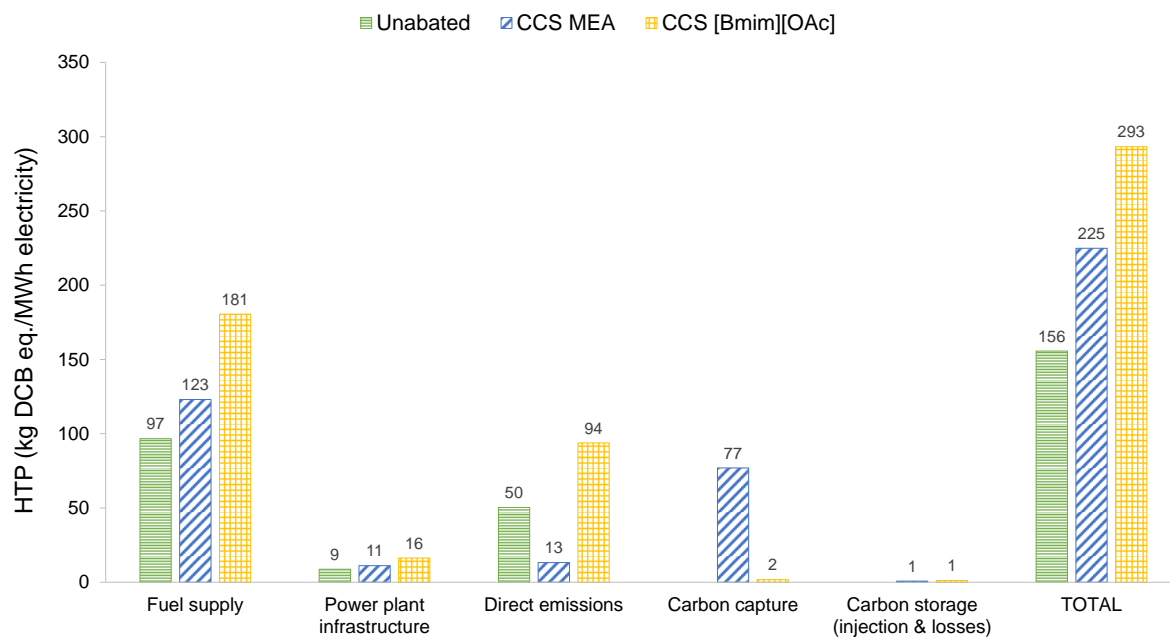

### (b) Photochemical oxidants creation potential (POCP)

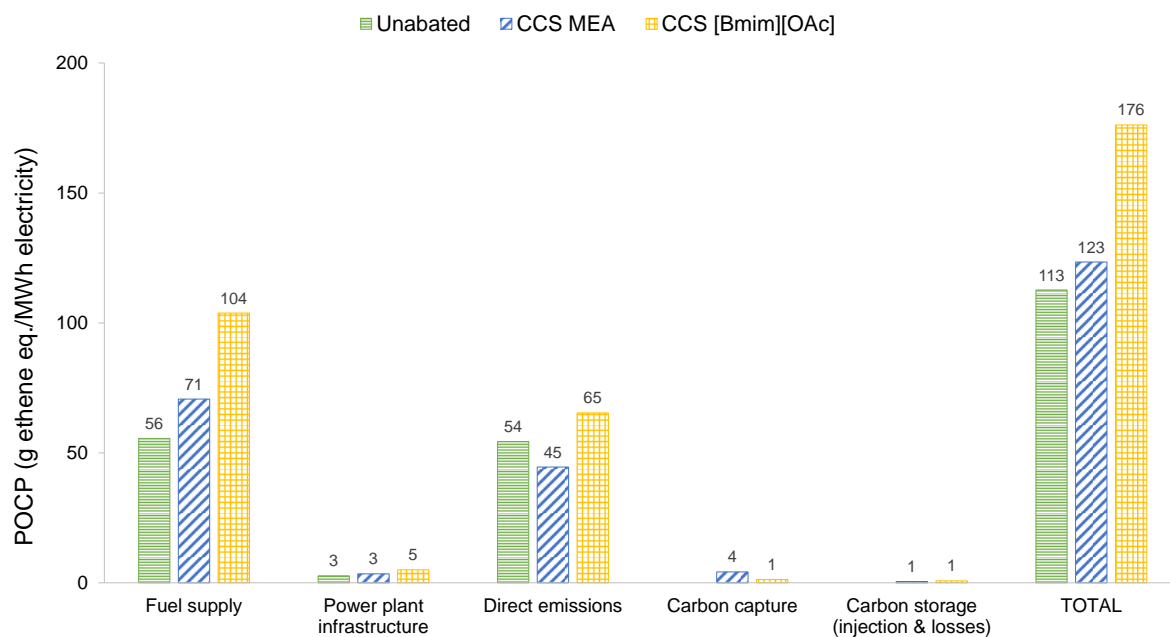

**Figure S2 (a) Human toxicity potential, and (b) Photochemical oxidants creation potential of the three power plant systems with contribution from different life cycle stages.**

[Coal power plant with carbon capture and storage using monoethanolamine for CO<sub>2</sub> capture (CCS MEA); coal power plant with carbon capture and storage using ionic liquid [Bmim][AOC] for CO<sub>2</sub> capture (CCS [Bmim][AOC]). Carbon storage includes CO<sub>2</sub> injection and CO<sub>2</sub> losses].

(a) Eutrophication potential (EP)

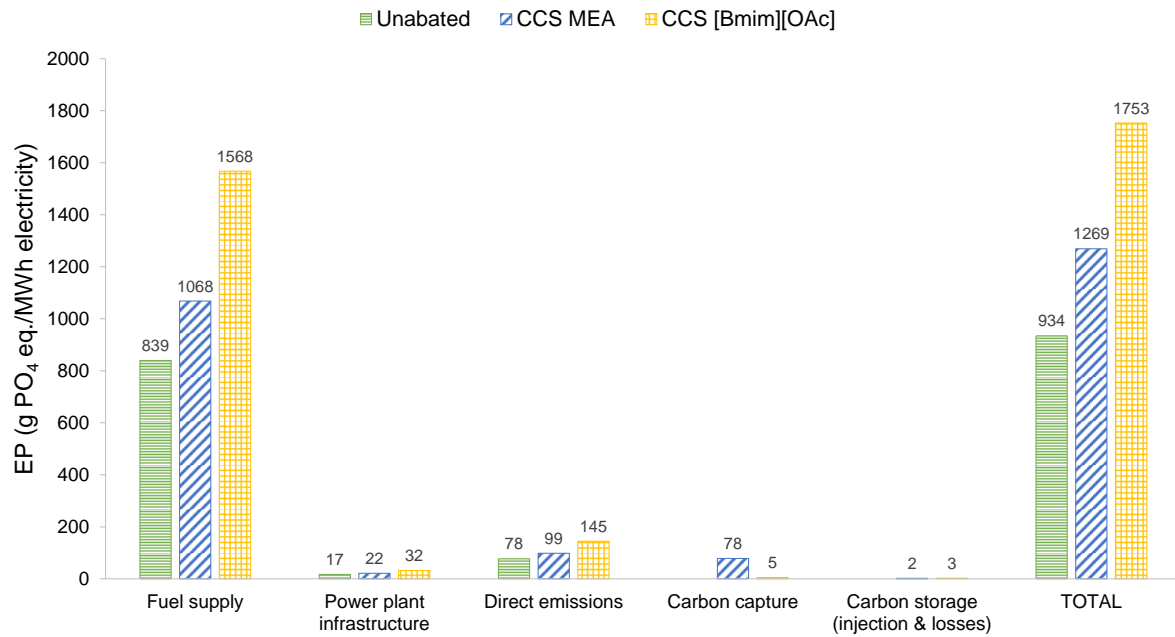

(b) Ozone depletion potential (ODP)

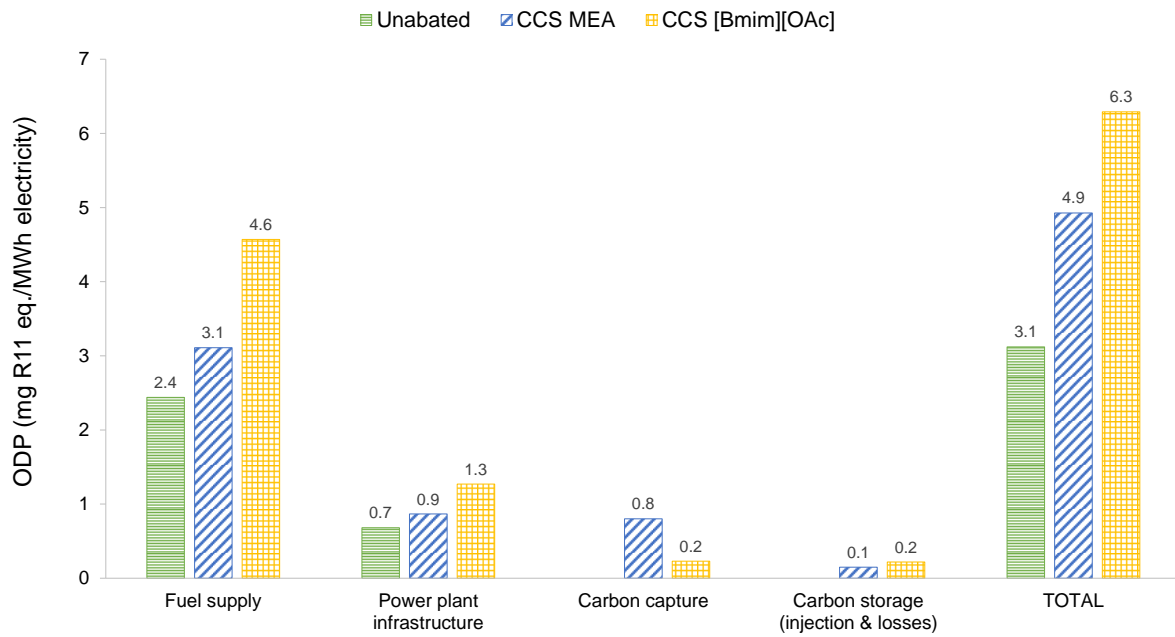

**Figure S3 (a) Eutrophication potential, and (b) Ozone depletion potential of the three power plant systems with contribution from different life cycle stages.**

[Coal power plant with carbon capture and storage using monoethanolamine for CO<sub>2</sub> capture (CCS MEA); coal power plant with carbon capture and storage using ionic liquid [Bmim][AOC] for CO<sub>2</sub> capture (CCS [Bmim][AOC]). Carbon storage includes CO<sub>2</sub> injection and CO<sub>2</sub> losses].

(a) Fresh aquatic ecotoxicity potential (FAETP)

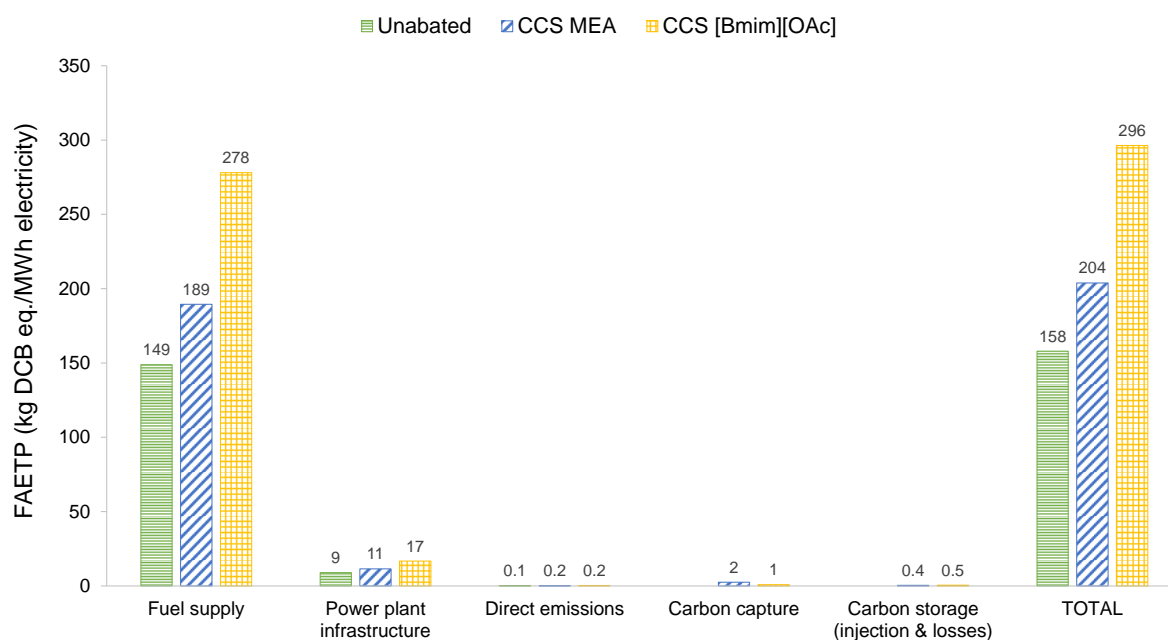

(b) Terrestrial ecotoxicity potential (TETP)

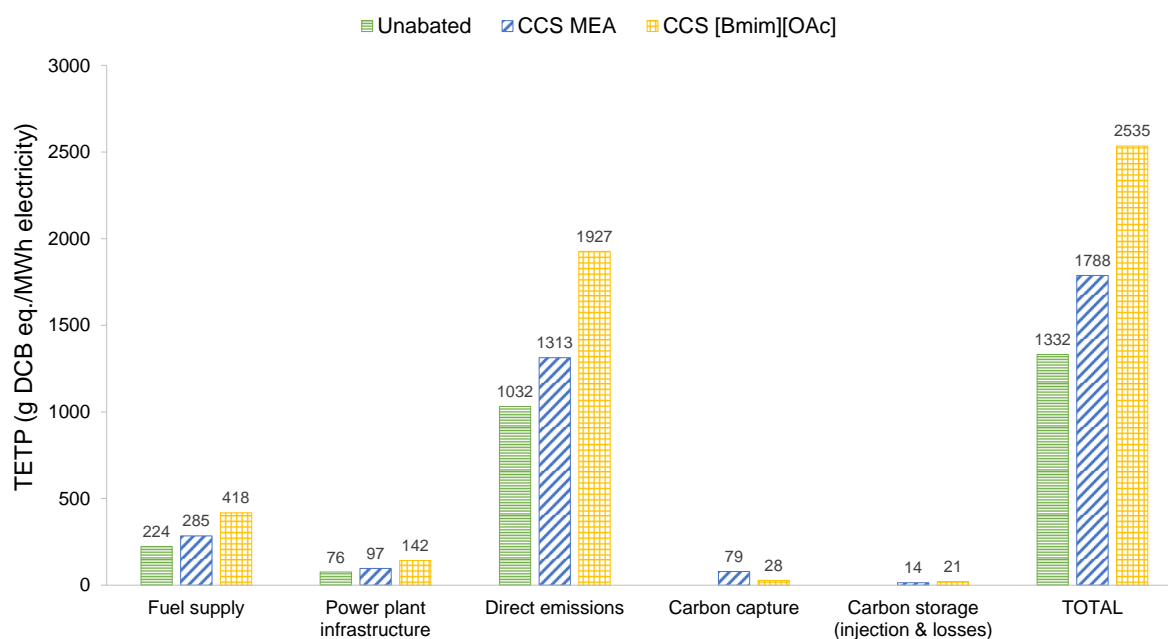

**Figure S4 (a) Fresh aquatic ecotoxicity potential, and (b) Terrestrial ecotoxicity potential of the three power plant systems with contribution from different life cycle stages.**

[Coal power plant with carbon capture and storage using monoethanolamine for CO<sub>2</sub> capture (CCS MEA); coal power plant with carbon capture and storage using ionic liquid [Bmim][AOC] for CO<sub>2</sub> capture (CCS [Bmim][AOC]). Carbon storage includes CO<sub>2</sub> injection and CO<sub>2</sub> losses].

(a) Abiotic depletion of elements potential (ADP)

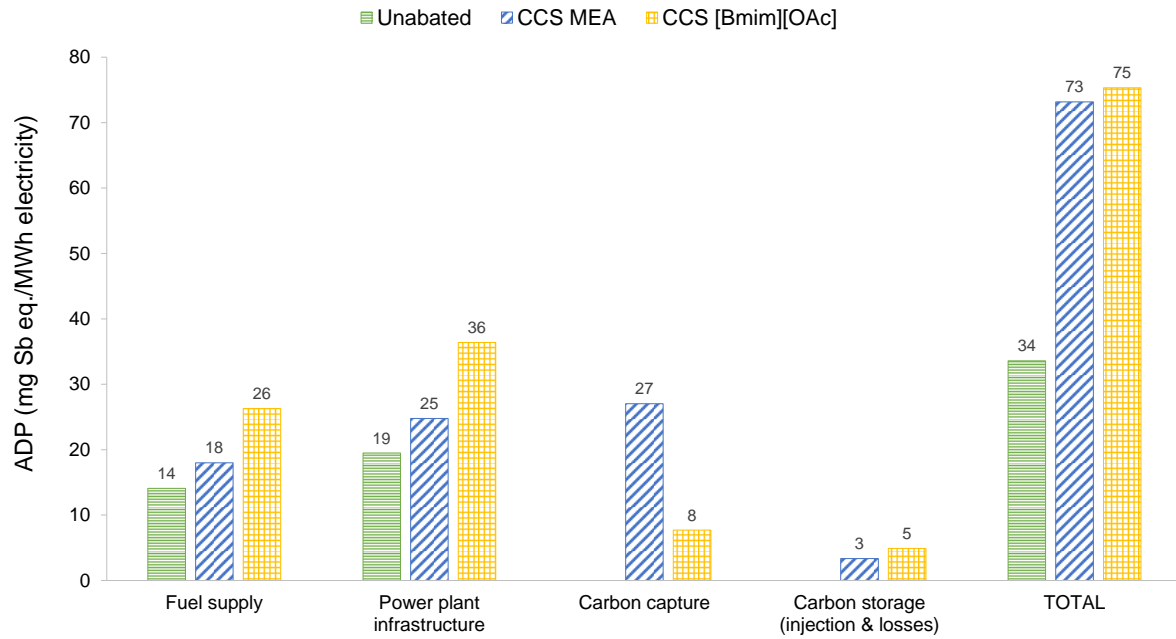

(b) Abiotic depletion potential fossil (ADP fossil)

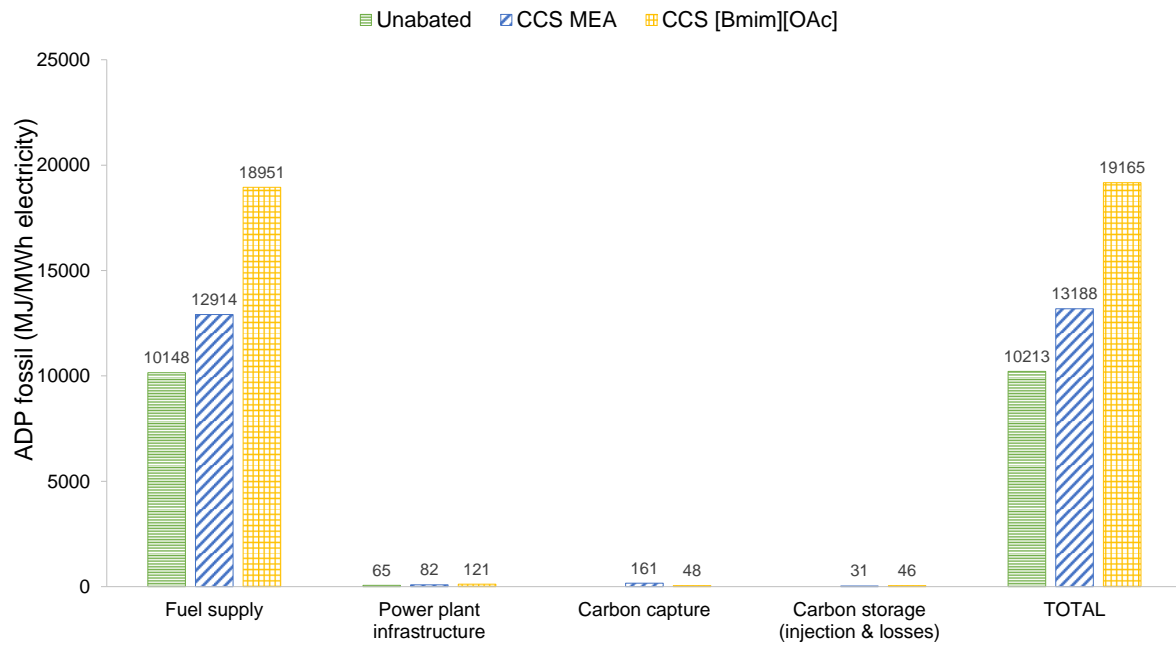

**Figure S5 (a) Abiotic depletion of elements potential, and (b) Abiotic depletion potential fossil of the three power plant systems with contribution from different life cycle stages.**

[Coal power plant with carbon capture and storage using monoethanolamine for CO<sub>2</sub> capture (CCS MEA); coal power plant with carbon capture and storage using ionic liquid [Bmim][AOc] for CO<sub>2</sub> capture (CCS [Bmim][AOc]). Carbon storage includes CO<sub>2</sub> injection and CO<sub>2</sub> losses].

## S6. Contribution analysis of main precursors in the production of [Bmim][OAc]

Table S8 Environmental impacts and contribution analysis for the production of 1.26 kg of [Bmim][MeSO<sub>4</sub>]<sup>a</sup>

| Environmental impacts          | GWP<br>(kg CO <sub>2</sub> eq.) | ADP<br>elements<br>(mg Sb<br>eq.) | ADP<br>fossil (MJ) | AP<br>(g SO <sub>2</sub> eq.) | EP<br>(g PO <sub>4</sub> eq.) | FAETP<br>(kg DCB eq.) | HTP<br>(kg DCB eq.) | MAETP<br>(t DCB eq.) | ODP<br>(mg R11 eq.) | POCP<br>(g Ethene<br>eq.) | TETP<br>(g DCB eq.) |
|--------------------------------|---------------------------------|-----------------------------------|--------------------|-------------------------------|-------------------------------|-----------------------|---------------------|----------------------|---------------------|---------------------------|---------------------|
|                                | 4.6                             | 25                                | 94                 | 23                            | 8                             | 1.0                   | 2.6                 | 3                    | 0.39                | 3                         | 42                  |
| Life cycle stages <sup>b</sup> | % Contributions                 |                                   |                    |                               |                               |                       |                     |                      |                     |                           |                     |
| 1-butylimidazole               | 77                              | 56                                | 77                 | 41                            | 51                            | 57                    | 60                  | 63                   | 66                  | 67                        | 62                  |
| Dimethyl sulfate               | 18                              | 26                                | 20                 | 56                            | 45                            | 32                    | 26                  | 28                   | 27                  | 30                        | 24                  |
| Process energy                 | 2.9                             | 0.0                               | 2.2                | 0.4                           | 0.2                           | 0.1                   | 0.6                 | 0.1                  | 5.0                 | 0.8                       | 0.2                 |
| Chemical plant & transport     | 1.7                             | 18.1                              | 1.0                | 2                             | 4                             | 11                    | 13.2                | 8.5                  | 1.8                 | 1.8                       | 13.7                |

<sup>a</sup> Required for the production of 1 kg of [Bmim][OAc]. <sup>b</sup> Cradle to gate.

Table S9 Environmental impacts and contribution analysis for the production of 1.19 kg of [Bmim][HSO<sub>4</sub>]<sup>a</sup>

| Environmental impacts          | GWP<br>(kg CO <sub>2</sub> eq.) | ADP<br>elements<br>(mg Sb<br>eq.) | ADP<br>fossil (MJ) | AP<br>(g SO <sub>2</sub> eq.) | EP<br>(g PO <sub>4</sub> eq.) | FAETP<br>(kg DCB eq.) | HTP<br>(kg DCB eq.) | MAETP<br>(t DCB eq.) | ODP<br>(mg R11 eq.) | POCP<br>(g Ethene<br>eq.) | TETP<br>(g DCB eq.) |
|--------------------------------|---------------------------------|-----------------------------------|--------------------|-------------------------------|-------------------------------|-----------------------|---------------------|----------------------|---------------------|---------------------------|---------------------|
|                                | 5.3                             | 29                                | 101                | 24                            | 9                             | 1                     | 3                   | 3.2                  | 0.48                | 2.87                      | 47                  |
| Life cycle stages <sup>b</sup> | % Contributions                 |                                   |                    |                               |                               |                       |                     |                      |                     |                           |                     |
| [Bmim][MeSO <sub>4</sub> ]     | 85                              | 85                                | 88                 | 96                            | 95                            | 90                    | 86                  | 92                   | 77                  | 94                        | 88                  |
| Water                          | 0                               | 0                                 | 0                  | 0                             | 0                             | 0                     | 0                   | 0                    | 0                   | 0                         | 0                   |
| Process energy                 | 14                              | 0                                 | 11                 | 2                             | 1                             | 1                     | 3                   | 1                    | 21                  | 4                         | 1                   |
| Chemical plant & transport     | 1                               | 15                                | 1                  | 2                             | 4                             | 9                     | 11                  | 7                    | 1                   | 2                         | 11                  |

<sup>a</sup> Required for the production of 1 kg of [Bmim][OAc]. <sup>b</sup> Cradle to gate.

## References

1. M. T. Clough, K. Geyer, P. A. Hunt, J. Mertes and T. Welton, *Physical Chemistry Chemical Physics*, 2013, **15**, 20480-20495.
2. M. B. Shiflett, D. W. Drew, R. A. Cantini and A. Yokozeki, *Energy & Fuels*, 2010, **24**, 5781-5789.
3. K. G. Bogolitsyn, T. E. Skrebets and T. A. Makhova, *Russian Journal of General Chemistry*, 2009, **79**, 125-128.
4. V. P. Tuguldurova, A. V. Fateev, O. K. Poleshchuk and O. V. Vodyankina, *Physical Chemistry Chemical Physics*, 2019, **21**, 9326-9334.
5. K. Ebel, H. Koehler, A. O. Gamer and R. Jackh, in *Ullmann's Encyclopedia of Industrial Chemistry*, Wiley. doi:10.1002/14356007.a13\_661, 2000, DOI: 10.1002/14356007.a13\_661.
6. A. Mehrkesh and A. T. Karunanithi, *ACS Sustainable Chemistry & Engineering*, 2013, **1**, 448-455.
7. S. D. Chambreau, J. A. Boatz, G. L. Vaghjiani, C. Koh, O. Kostko, A. Golan and S. R. Leone, *The Journal of Physical Chemistry A*, 2012, **116**, 5867-5876.
8. M. H. Keshavarz, B. Nazari, M. Jafari and R. Bakhtiari, 2018, **3**, 3505-3510.
9. NIST, <https://webbook.nist.gov/chemistry/>).
10. BEIS, *Energy Trends March 2018*, Department for Business, Energy & Industrial Strategy. Available at: [www.gov.uk/government/statistics/energytrends-march-2018](http://www.gov.uk/government/statistics/energytrends-march-2018), 2018.
11. EEA, *Overview of electricity production and use in Europe*, European Environment Agency. Available at: <https://www.eea.europa.eu/data-and-maps/indicators/overview-of-the-electricity-production-2/assessment-4>, 2019.
12. Eurostat, *Electricity production, consumption and market overview*. Available at: [https://ec.europa.eu/eurostat/statistics-explained/index.php/Electricity\\_production,\\_consumption\\_and\\_market\\_overview#Electricity\\_generation](https://ec.europa.eu/eurostat/statistics-explained/index.php/Electricity_production,_consumption_and_market_overview#Electricity_generation), 2020.
